# Supplementary material for: Mesoporous Silica Derived from Municipal Solid Waste Incinerator (MSWI) Ash Slag: Synthesis, Characterization and Use as Supports for Au(III) Recovery
Source: MDPI journal article supplement (doi:10.3390/ma14226894), 2021-11-15
Supplement: s1 [file s1]

# Mesoporous Silica Derived from Municipal Solid Waste Incinerator (MSWI) Ash Slag: Synthesis, Characterization and Use as Supports for Au(III) Recovery

Yosep Han <sup>1,2,\*†</sup>, Seongsoo Han <sup>3†</sup>, Seongmin Kim <sup>1</sup>, Minuk Jung <sup>1</sup>, Ho-Seok Jeon <sup>1,2</sup>, Siyoung Q. Choi <sup>3,\*</sup>, KyuHan Kim <sup>4,\*</sup> and Youngjae Kim <sup>1,2,\*</sup>

<sup>1</sup> Resources Recovery Research Center, Mineral Resources Division, Korea Institute of Geoscience & Mineral Resources (KIGAM), Daejeon 34132, Korea; smkim@kigam.re.kr (S.K.); mujung@kigam.re.kr (M.J.); hsjeon@kigam.re.kr (H.-S.J.)

<sup>2</sup> Department of Resources Recycling, University of Science and Technology (UST), Daejeon 34113, Korea

<sup>3</sup> Department of Chemical and Biomolecular Engineering, Korea Advanced Institute of Science and Technology (KAIST), 291, Daejeon 34141, Korea; sshan12@kaist.ac.kr

<sup>4</sup> Department of Chemical and Biomolecular Engineering, Seoul National University of Science and Technology, Seoul 01811, Korea

\* Correspondence: yosep@kigam.re.kr, Tel.: +81-42-868-3181 (Y.H.); sqchoi@kaist.ac.kr, Tel. +92-42-350-3914 (S.Q.C.); youngjae.kim@kigam.re.kr, Tel. +82-42-868-3265 (Y.K.); kyuhankim@seoultech.ac.kr (K.K.)

† These authors contributed equally to this work

**Citation:** Han, Y.; Han, S.; Kim, S.; Jung, M.; Jeon, H.-S.; Choi, S.Q.; Kim, K.; Kim, Y. Mesoporous Silica Derived from Municipal Solid Waste Incinerator (MSWI) Ash Slag: Synthesis, Characterization and Use as Supports for Au(III) Recovery. *Materials* **2021**, *14*, 6894. <https://doi.org/10.3390/ma14226894>

Academic Editor: José Miguel Hidalgo Herrador

Received: 27 October 2021

Accepted: 9 November 2021

Published: 15 November 2021

**Publisher's Note:** MDPI stays neutral with regard to jurisdictional claims in published maps and institutional affiliations.

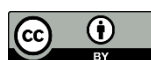

**Copyright:** © 2021 by the authors. Submitted for possible open access publication under the terms and conditions of the Creative Commons Attribution (CC BY) license (<http://creativecommons.org/licenses/by/4.0/>).

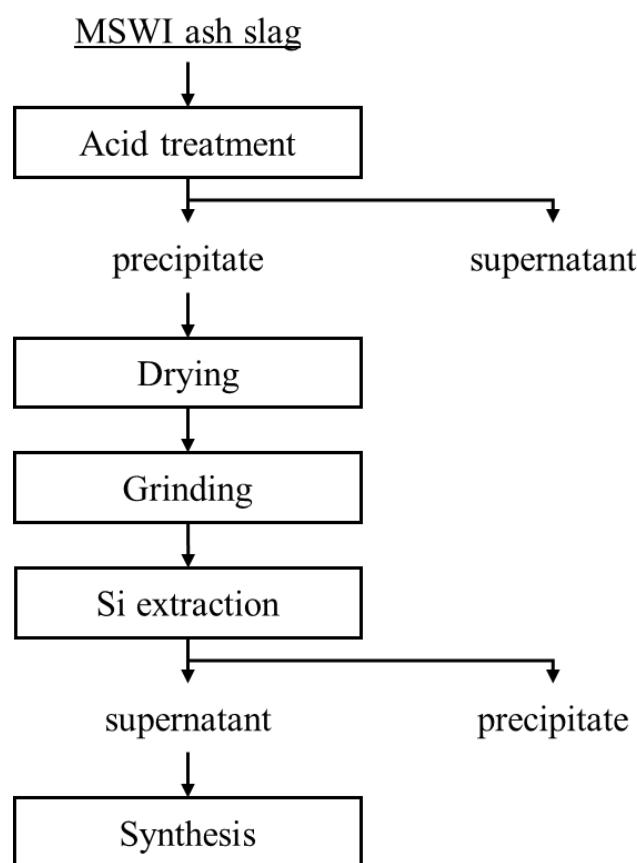

**Figure 1.** The synthesis process flow diagram of mesoporous silica from MSWI ash slag.
